# Supplementary material
Source: publisher site journal article supplement (https://www.dovepress.com/article/547484)
Supplement: Supplementary file 1 [file Supplementary%20materials.docx]

**Supplementary Materials**

**Supplementary Table 1.** Diagnostic criteria of the cardiac conduction block in current study.

**Supplementary Table 2.** Multivariate Cox proportional hazards regression model for the impact of different baseline hsCRP levels on the incidence of cardiac conduction block.

**Supplementary Table 1.** Diagnostic criteria of the cardiac conduction block in current study

| Disease Diagnosis | Diagnostic criteria |
| --- | --- |
| Atrioventricular block (AVB) |  |
| First-degree AVB | P waves associated with 1:1 atrioventricular conduction and a PR interval >200ms (this is more accurately defined as atrioventricular delay because no P waves are blocked). |
| Second-degree AVB | P waves with a constant rate (<100 bpm) where atrioventricular conduction is present but not 1:1 |
| Mobitz type I: P waves with a constant rate (<100 bpm) with a periodic single nonconducted P wave associated with P waves before and after the nonconducted P wave with inconstant PR intervals. |
| Mobitz type II is characterized by fixed PR intervals before and after blocked beats and is usually associated with a wide QRS complex. |
| Third-degree AVB | P wave and QRS wave were rhythmical and uncorrelated with each other. Atrial rate was faster than ventricular rate. |
| Bundle branch block (BBB) |  |
| Right BBB (RBBB) |  |
| Complete RBBB | 1) QRS duration of 120ms or longer in the presence of normal sinus rhythm or supraventricular rhythm; 2) R or rSR′ complex in lead V1; 3) rS in leads V5, V6, I, or aVL with prolonged shallow S wave. |
| Incomplete RBBB | Same QRS morphology criteria as complete RBBB but with a QRS duration between 110 and 119ms. |
| Left BBB (LBBB) |  |
| Complete LBBB | 1) QRS duration of 120ms or longer in the presence of normal sinus rhythm or supraventricular rhythm (not atrial fibrillation); 2) QS or rS complex in lead V1; 3) broad R waves in leads I, aVL, V5-V6 (or an rS pattern in V5-V6); 4) absence of Q waves in leads V5, V6, or I. |
| Incomplete LBBB | 1) QRS duration between 110 and 119ms in adults; 2) Presence of left ventricular hypertrophy pattern; 3) R peak time >60ms in leads V4, V5, and V6; 4) Absence of Q wave in leads I, V5, and V6. |
| Left anterior fascicular block | 1) QRS duration <120ms; 2) Frontal plane axis between −45° and −90°; 3) R-peak time in lead aVL of ≥45ms; 4) qR (small r, tall R) pattern in lead aVL; 5) rS pattern (small r, deep S) in leads II, III, and aVF. |
| Left posterior fascicular block | 1) QRS duration <120ms; 2) Frontal plane axis between 90° and 180°; 3) rS (small r, deep S) pattern in leads I and aVL4) qR (small q, tall R) pattern in leads III and aVF. |
| Nonspecific intraventricular conduction disturbance (NS-IVCD) | QRS duration >110 ms when both RBBB and LBBB are excluded. |

**Supplementary Table 2.** Multivariate Cox proportional hazards regression model for the impact of different baseline hsCRP[[1]](#footnote-1) levels on the incidence of CCB[[2]](#footnote-2)

|  | Total Sample,per IQR increment[[3]](#footnote-3) | hsCRP<2mg/L | hsCRP≥2mg/L | *p* for trend |
| --- | --- | --- | --- | --- |
| 2006 |  |  |  |  |
| Cases/Total | 1907/48703 | 1384/38806 | 523/9897 |  |
| Incidence rate/1000,person years | 2.56 | 2.36 | 3.27 |  |
| Model 1[[4]](#footnote-4) HR (95%CI) | 1.08(1.06,1.10) | Reference | 1.33(1.20,1.46) | <0.001 |
| Model 2[[5]](#footnote-5) HR(95%CI) | 1.08(1.06,1.10) | Reference | 1.28(1.15,1.41) | <0.001 |
| Model 3[[6]](#footnote-6) HR(95%CI) | 1.08(1.06,1.10) | Reference | 1.29(1.16,1.42) | <0.001 |
| Model 4[[7]](#footnote-7) HR(95%CI) | 1.07(1.05,1.09) | Reference | 1.20(1.08,1.34) | <0.001 |
| 2012 |  |  |  |  |
| Cases/Total | 803/48703 | 686/42381 | 117/6322 |  |
| Incidence rate/1000,person years | 1.78 | 1.75 | 2.05 |  |
| Model 1 HR(95%CI) | 1.08(1.02,1.13) | Reference | 1.14(0.94,1.39) | 0.187 |
| Model 2 HR(95%CI) | 1.08(1.02,1.14) | Reference | 1.12(0.92,1.37) | 0.251 |
| Model 3 HR(95%CI) | 1.08(1.02,1.14) | Reference | 1.12(0.92,1.37) | 0.249 |
| Model 4 HR(95%CI) | 1.07(1.00,1.15) | Reference | 1.05(0.86,1.30) | 0.628 |

1. hsCRP: high-sensitivity C-reactive protein [↑](#footnote-ref-1)
2. CCB: cardiac conduction block [↑](#footnote-ref-2)
3. Per IQR increment: each interquartile range increase in time-weighted cumulative hsCRP [↑](#footnote-ref-3)
4. Model 1: adjusted for age and sex [↑](#footnote-ref-4)
5. Model 2: adjusted for current smoker, current drinker, physical activity, high salt intake, taking antihypertensive, hypoglycemic, lipid-lowering drugs, body mass index, and low density lipoprotein cholesterol at baseline based on Model 1 [↑](#footnote-ref-5)
6. Model 3: adjusted for new-onset myocardial infarction and heart failure during follow-up based on Model 2 [↑](#footnote-ref-6)
7. Model 4: adjusted for time-weighted cumulative hsCRP from 2006 to 2012 based on Model 3 [↑](#footnote-ref-7)
